# Supplementary material for: Significant role of biomass burning in heavy haze formation in a megacity: Molecular-level insights from intensive PM 2.5 sampling on winter hazy days
Source: Copernicus journal article supplement (doi:10.5194/egusphere-2024-2098), 2024-08-19
Supplement: Supplementary file 1 [file egusphere-2024-2098-supplement.pdf]

1           **Significant role of biomass burning in heavy haze**  
2           **formation in a megacity: Molecular-level insights from**  
3           **intensive PM<sub>2.5</sub> sampling on winter hazy days**

4           Mingjie Kang<sup>1,2</sup>, Mengying Bao<sup>1,2,3</sup>, Wenhui Song<sup>1,2</sup>, Aduburexiati Abulimiti<sup>1,2</sup>, Fang  
5                                   Cao<sup>1,2</sup>, Sönke Szidat<sup>4</sup>, Yanlin Zhang<sup>1,2</sup>

6           <sup>1</sup> School of Ecology and Applied Meteorology, Nanjing University of Information Science and  
7           Technology. Nanjing 210044, China.

8           <sup>2</sup> Atmospheric Environment Center, Joint Laboratory for International Cooperation on Climate and  
9           Environmental Change, Ministry of Education, Nanjing University of Information Science and  
10           Technology. Nanjing 210044, China.

11           <sup>3</sup> Huzhou Meteorological Administration, Huzhou, 313000, China

12           <sup>4</sup> Department of Chemistry, Biochemistry and Pharmaceutical Sciences & Oeschger Centre for Climate  
13           Change Research, University of Bern, Bern, 3012, Switzerland

14  
15           Correspondence to: Yanlin Zhang (zhangyanlin@nuist.edu.cn; dryanlinzhang@outlook.com)

16  
17

18 **Text S1: The isomeric ratios of anhydrosugars**

19 The isomeric ratios of anhydrosugars are good indicators of biofuels. For instance, the ratio of  
20 levoglucosan to mannosan (L/M) tends to be higher for hardwood and crop residues than those  
21 for softwood (Engling et al., 2006; Sang et al., 2013; Schmidl et al., 2008; Zhu et al., 2015).  
22 Additionally, smoke particles emitted from crop straws, grasses, and biomass briquettes  
23 combustion were reported to contain higher amounts of galactosan than mannosan (Fu et al.,  
24 2008; Oros et al., 2006; Sheesley et al., 2003). Therefore, the lower L/M and M/G ratios during  
25 the first episode ( $\text{PM}_{2.5} > 200 \mu\text{g m}^{-3}$ ) likely indicate mixed contributions from softwood and  
26 crop burning to heavy haze formation (Figure S9). In fact, the impact of softwood combustion  
27 becomes larger in winter according to the previous report by Cheng (2013). However, the  
28 contribution of hardwood burning could not be neglected either, especially in moderate haze  
29 events (Figure S8a and Figure S9). This is supported by the rising L/M values with decreasing  
30  $\text{PM}_{2.5}$  levels as shown in Figure S8b.

31 **Text S2: Chloride in  $\text{PM}_{2.5}$  samples**

32 Chlorine plays a part in global tropospheric chemistry, affecting the atmospheric  
33 oxidation capacity and consequently affecting the formation of  $\text{PM}_{2.5}$  and  $\text{O}_3$ ,  
34 particularly in winter (Wang et al., 2019, 2020; Yi et al., 2023). In this study, the  
35 absolute abundance of particulate  $\text{Cl}^-$  decreased with falling  $\text{PM}_{2.5}$  levels (1.88-10.2  $\mu\text{g}$   
36  $\text{m}^{-3}$ ), while its relative contributions to total  $\text{PM}_{2.5}$  were on the rise (from 3.2% to 8.7%)  
37 (Figure 4). An early study concluded that low temperature and high RH facilitate the  
38 generation of  $\text{PM}_{2.5}$ -bound  $\text{Cl}^-$  (Wang et al., 2023), which can account for high  $\text{Cl}^-$   
39 concentrations in first episode. Based on the backward trajectories of air masses in  
40 Figure S1 and S2, roughly three sorts of trajectories were found in Nanjing during the  
41 whole sampling period, i.e., continental, marine, and mixed airmasses. Marine sources  
42 dominate the global tropospheric chlorine budget mainly through mobilization of  
43 chloride from sea-salt aerosols (Wang et al., 2019), as indicated by the obvious  
44 correlation between  $\text{Cl}^-$  and  $\text{Na}^+$  ( $r = 0.64$ ,  $p < 0.01$ ). The rising  $\text{Cl}^-$  proportion with  
45 decreasing  $\text{PM}_{2.5}$  level might be linked to growing influences of sea-salt aerosols via  
46 long-range atmospheric transport. In China, however, chlorine is mostly anthropogenic,

47 including coal combustion, BB, waste incineration, and industrial processes (Fu et al.,  
48 2018; Li et al., 2012; Yang et al., 2018). The positive relationship of  $\text{Cl}^-$  with  
49 levoglucosan proves a possible source of BB over this site ( $r = 0.50$ ,  $p < 0.05$ ). The  
50 higher mass ratios of  $\text{Cl}^-/\text{Na}^+$  (about 5.5-15.5) in these samples than sea water (1.81)  
51 also indicate a significant contribution of anthropogenic sources to  $\text{Cl}^-$  in wintertime  
52 haze over Nanjing. The concentrations of  $\text{Cl}^-$  measured in this study (average:  $6.38 \pm$   
53  $2.00 \mu\text{g m}^{-3}$ ) are comparable to those observed in winter in Beijing (Wang et al., 2005)  
54 but slightly higher than those in a coastal megacity of Shanghai, China (Wang et al.,  
55 2006; Ye et al., 2003).

### 56 **Text S3: Unsaturated diacids**

57 Maleic (cis-isomer) and fumaric (trans-isomer) acid are two principal aliphatic unsaturated  
58 diacids found in this study, with concentration ranges of 0.86-41.9  $\text{ng m}^{-3}$  and 1.61-27.6  $\text{ng m}^{-3}$ ,  
59 respectively. Significant correlation between fumaric and maleic acid ( $r = 0.81$ ,  $p < 0.01$ )  
60 suggests they may share common sources. In fact, maleic acid, which is a probable product  
61 from photochemical oxidation of benzene, could be isomerized photochemically to trans  
62 configuration (fumaric acid) in the air with solar radiation, thus M/F ratios depend on the  
63 production of maleic acid and the subsequent transformation to fumaric acid. The M/F ratios  
64 were higher in second episode with high temperature and low RH (average:  $1.38 \pm 0.35$ ), but  
65 lower in other two episodes (average:  $0.71 \pm 0.28$  and  $0.85 \pm 0.44$ , respectively). Higher M/F  
66 values may be attributed to the superior photochemical generation of maleic acid over the cis-  
67 to-trans isomerization at high ambient temperature and low RH, whereas lower ratios might be  
68 in part due to the depressed maleic acid production by low temperature (Kawamura and  
69 Ikushima, 1993).

### 70 **Text S4: Monocarboxylic acids**

71 Two monocarboxylic acids, formic and acetic acid, were determined too. Both formic and acetic  
72 acids showed a decreasing temporal trend with decreasing  $\text{PM}_{2.5}$  values, with the highest  
73 concentrations appearing in the heaviest haze events (average:  $0.18 \pm 0.05 \mu\text{g m}^{-3}$  for formic  
74 acid and  $0.22 \pm 0.11 \mu\text{g m}^{-3}$  for acetic acid, respectively). Lower temperature and higher RH in

75 this episode favor gas to particle conversion leading to high particulate concentrations. A clear  
76 relationship between formic and acetic acid existed ( $r = 0.88$ ,  $p < 0.01$ ), suggesting similar  
77 sources. Furthermore, formic and acetic acid both correlated significantly with levoglucosan ( $r$   
78  $= 0.73$ ,  $p < 0.01$  and  $r = 0.61$ ,  $p < 0.01$ , respectively), indicating BB is a significant source of  
79 these acids. Formic acid was associated with EC as well ( $r = 0.67$ ,  $p < 0.01$ ), demonstrating  
80 fossil fuel is another contributor. Actually, secondary sources are also important in the  
81 atmospheric budgets of formic and acetic acids (Paulot et al., 2011). The ratio of acetic to formic  
82 acid (A/F) can be used to estimate relative importance of primary emissions ( $> 1$ ) and secondary  
83 photochemical transformations ( $< 1$ ) to carboxylic acids (Wang et al., 2007). The average A/F  
84 ratio for three episodes was  $1.15 \pm 0.32$ ,  $1.30 \pm 0.52$ ,  $1.1 \pm 0.30$ , respectively, suggesting  
85 relatively larger contributions from primary sources, such as BB, vegetation, coal burning,  
86 vehicular exhausts, and soil emissions in heating season (Khare et al., 1999; Stavrakou et al.,  
87 2012; Wang et al., 2007).

#### 88 **Text S5: Other identified chemicals**

89 Methylglyoxal (MeGly) was also detected in these  $PM_{2.5}$  aerosols, which are oxidation products  
90 from biogenic (e.g., isoprene/monoterpenes) and anthropogenic precursors (e.g., benzene,  
91 toluene, and xylenes) (Kampf et al., 2012). Most carbonyls are present in gas phase in the  
92 atmosphere. Thus, the high levels of MeGly observed in highest- $PM_{2.5}$  episode ( $20.4 \pm 29.2$  ng  
93  $m^{-3}$ ) might be due to lower temperature that allows more gaseous carbonyls partitioning into  
94 aerosol phase (Meng et al., 2018). In addition, fresh plumes from high BB activities during that  
95 time may play a role as well (Kampf et al., 2012). The MeGly abundances in other two episodes  
96 ( $10.1 \pm 4.93$  ng  $m^{-3}$  and  $6.43 \pm 3.04$  ng  $m^{-3}$ , respectively) were comparable to those from Beijing  
97  $PM_{2.5}$  samples (average:  $8.3 \pm 7.9$  ng  $m^{-3}$ ) (Zhao et al., 2018). A significant correlation between  
98 MeGly and  $^{14}C$ -WSOC was obtained in this study ( $r = 0.74$ ,  $p < 0.01$ ), suggesting non-fossil  
99 sources such as BB may contribute to atmospheric MeGly.

100 Methanesulfonic acid (MSA) is an oxidation product of dimethylsulfide (DMS) mainly released  
101 by marine phytoplankton. Thus MSA has long been regarded as a useful tracer for marine  
102 biogenic sulfur production (Chen et al., 2012; Legrand and Pasteur, 1998). Surprisingly,  
103 relatively abundant MSA was detected in this study, with higher levels occurring in the most

104 polluted episode ( $0.09 \pm 0.02 \mu\text{g m}^{-3}$ ) compared with other two episodes ( $0.04 \pm 0.01 \mu\text{g m}^{-3}$   
105 and  $0.02 \pm 0.01 \mu\text{g m}^{-3}$ , respectively). These values are similar to those reported from  $\text{PM}_{2.5}$   
106 aerosol in Beijing (Wang et al., 2005). Yuan et al. (2004) pointed out that anthropogenic sources,  
107 such as industrial emissions, could be additional sources for MSA in urban atmosphere. The  
108 ratio of  $\text{MSA}/\text{nss-SO}_4^{2-}$  (non-sea-salt sulfate) can be used to evaluate the relative contribution  
109 of marine sulfur emissions to total sulfur budget in the atmosphere (Legrand and Pasteur, 1998).  
110 On average,  $\text{MSA}/\text{nss-SO}_4^{2-}$  ratios for three episodes are  $0.003 \pm 0.001$ ,  $0.002 \pm 0.00$ ,  $0.002 \pm$   
111  $0.001$ , respectively. Such low values indicate the influences of marine biogenic sources from  
112 coastal and oceanic areas on urban haze formation are rather weak. The significant relationships  
113 between MSA and levoglucosan ( $r = 0.75$ ,  $p < 0.01$ ) imply BB could be an important source of  
114 MSA in addition to industrial emissions, which is also supported by the significant relationship  
115 of non-fossil WSOC with MSA ( $r = 0.79$ ,  $p < 0.01$ ).

116

117

118  
119  
120  
121  
122  
123  
124  
125  
126  
127  
128  
129  
130  
131  
132  
133  
134  
135  
136  
137  
138  
139  
140  
141  
142  
143  
144  
145  
146  
147  
148  
149  
150  
151  
152  
153  
154  
155  
156  
157  
158  
159  
160  
161

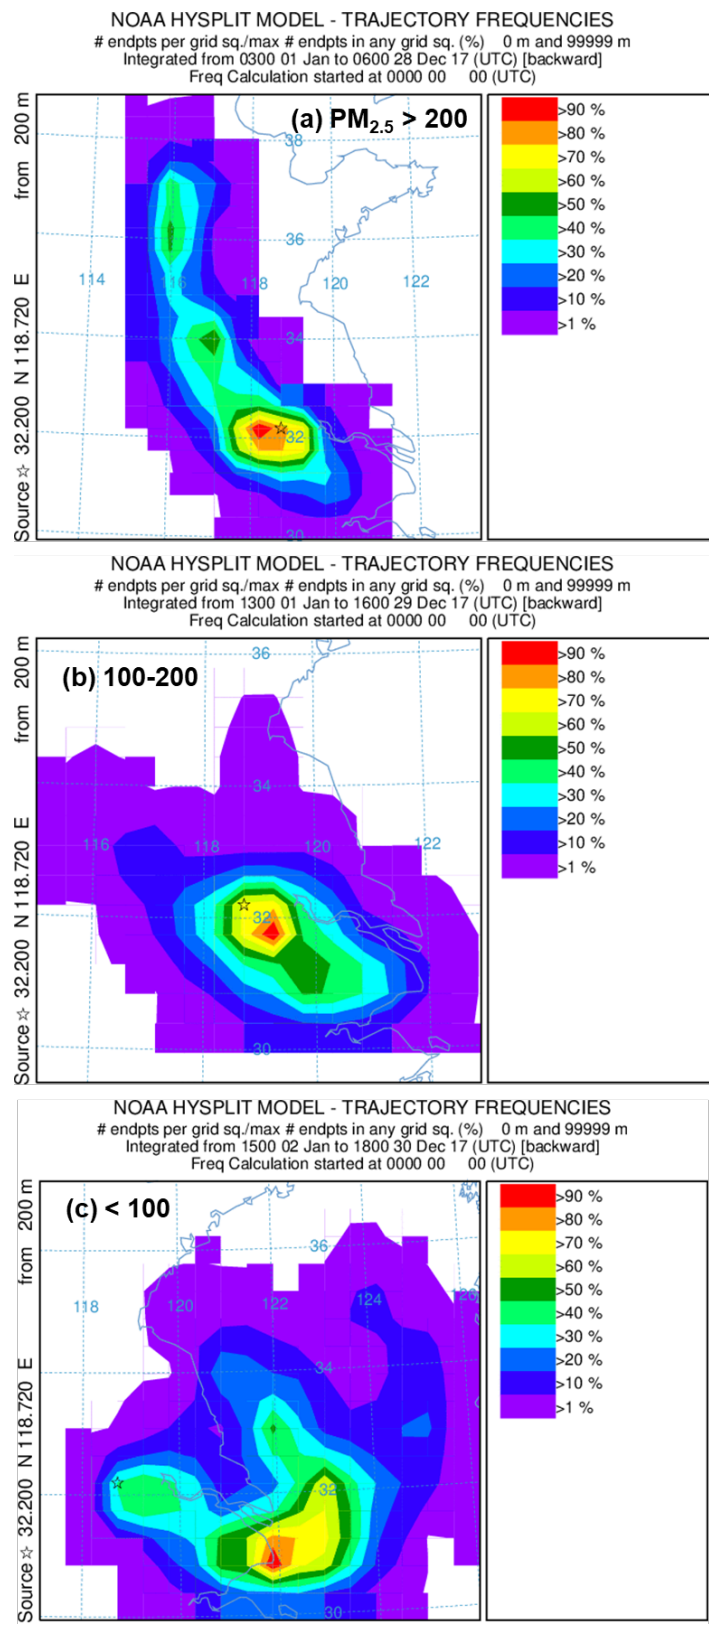

**Figure S1.** HYSPLIT back trajectories initiated over Nanjing with the altitude of these trajectories remaining below 200 m in the 48 h of the runs in three episodes according to  $PM_{2.5}$  concentrations. The black star indicates the sampling site.

162

163

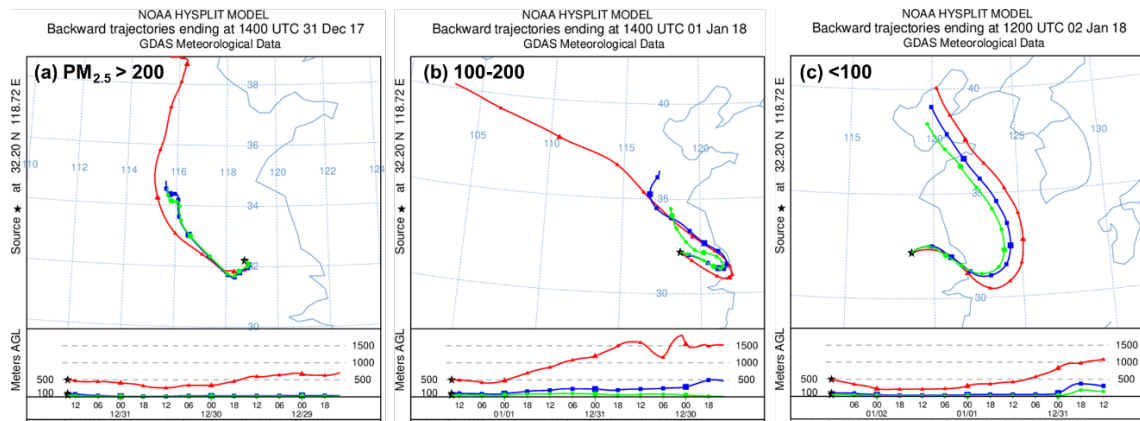

164

165

166

167

168

169

170

171

172

173

**Figure S2.** Three-day HYSPLIT back trajectories initiated over Nanjing with the altitude of these trajectories remaining below 500 m in the 72 h of the runs on the more polluted days in three episodes according to PM<sub>2.5</sub> concentrations. The black star indicates the sampling site.

174  
175  
176  
177  
178  
179  
180  
181  
182  
183  
184  
185  
186  
187  
188  
189  
190  
191  
192  
193  
194  
195  
196  
197  
198  
199  
200  
201  
202  
203  
204  
205  
206  
207  
208  
209  
210  
211  
212

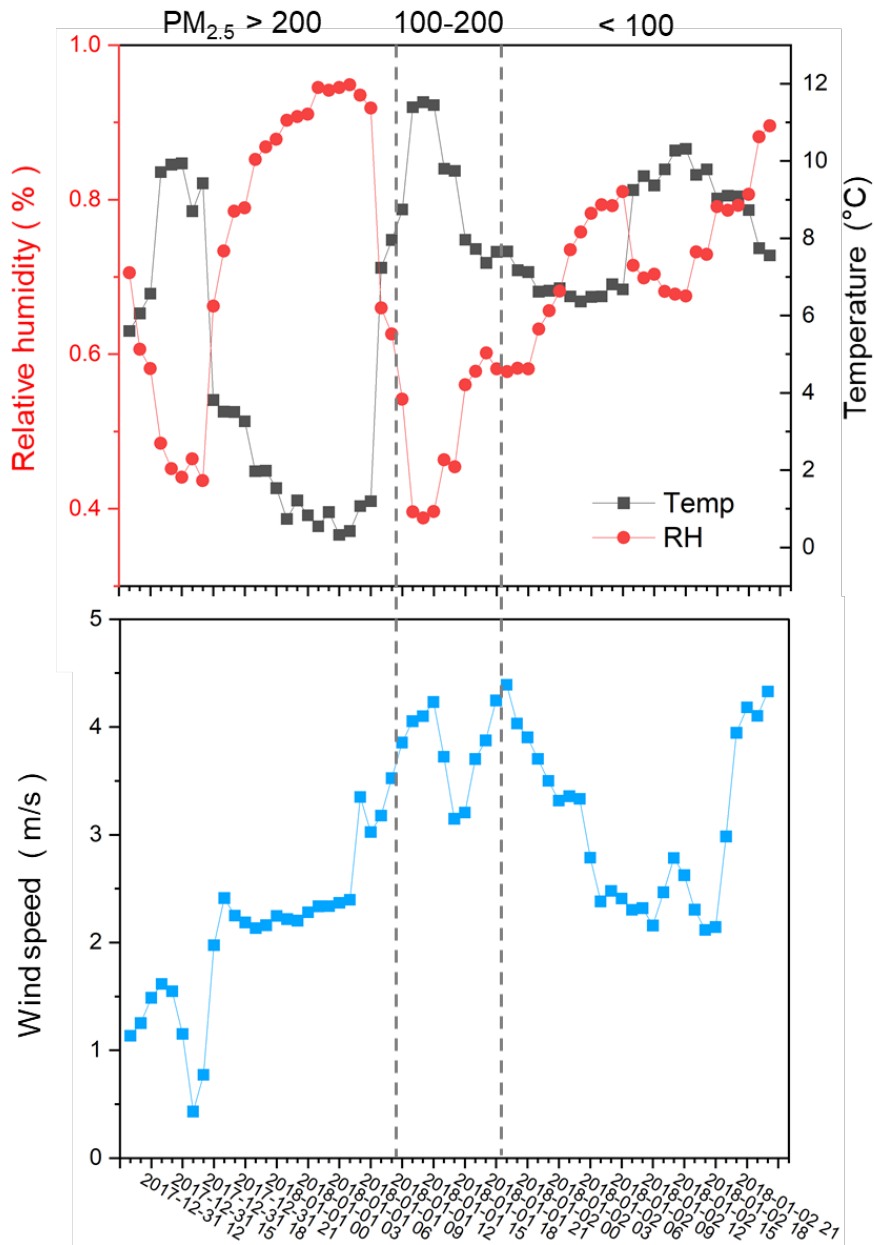

**Figure S3.** Time series of meteorological parameters (i.e., relative humidity, temperature, and wind speed) during sampling period in urban Nanjing.



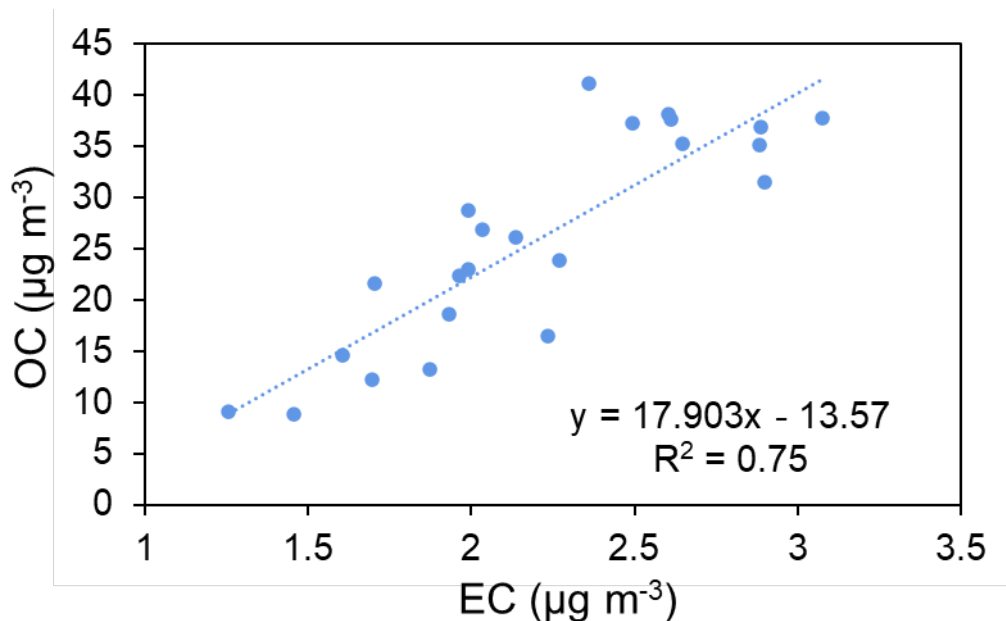

**Figure S4.** Based on the higher abundances of MSA and diacids in MBA together with  $\text{nss-SO}_4^{2-}$  ( $0.3$  to  $10.4 \mu\text{g m}^{-3}$ ), we suggest that these water-soluble organics as well as  $\text{nss-SO}_4^{2-}$  might enhance the hygroscopic growth of the ambient aerosols over the open ocean waters characterized by high biological activity, acting as CCN. GRL High abundances of oxalic, azelaic, and glyoxylic acids and methylglyoxal in the open ocean with high biological activity: Implication for secondary OA formation from isoprene

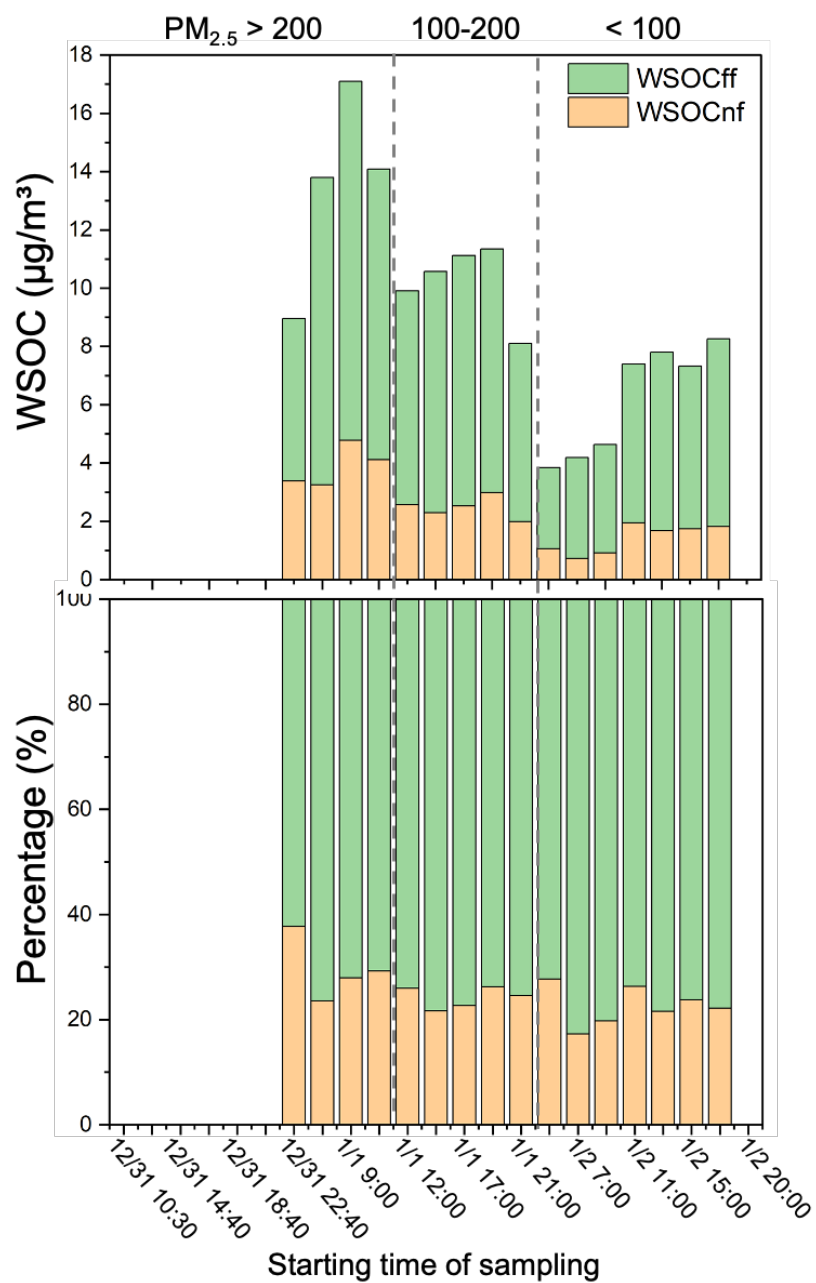

237

238 **Figure S5.** Temporal variations of fossil (ff) and non-fossil (nf) contribution to water-  
 239 soluble organic carbon (WSOC) in 2-hour PM<sub>2.5</sub> samples in Nanjing.

240

241  
 242  
 243  
 244  
 245  
 246  
 247  
 248  
 249  
 250  
 251  
 252  
 253  
 254  
 255  
 256  
 257  
 258  
 259  
 260  
 261  
 262  
 263  
 264  
 265  
 266  
 267

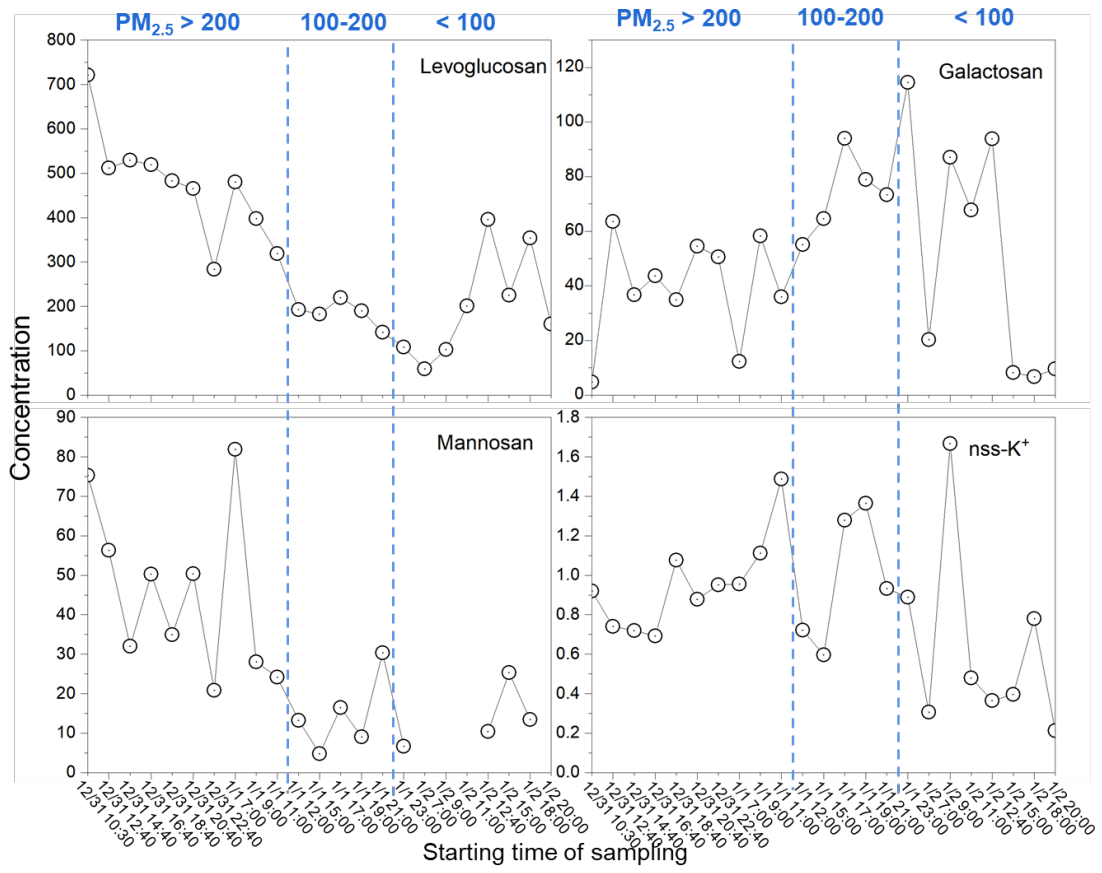

**Figure S6.** Temporal variations of biomass burning tracers including anhydrosugars (levoglucosan, galactosan, and mannosan, ng m<sup>-3</sup>) and non-sea-salt K<sup>+</sup> (µg m<sup>-3</sup>).

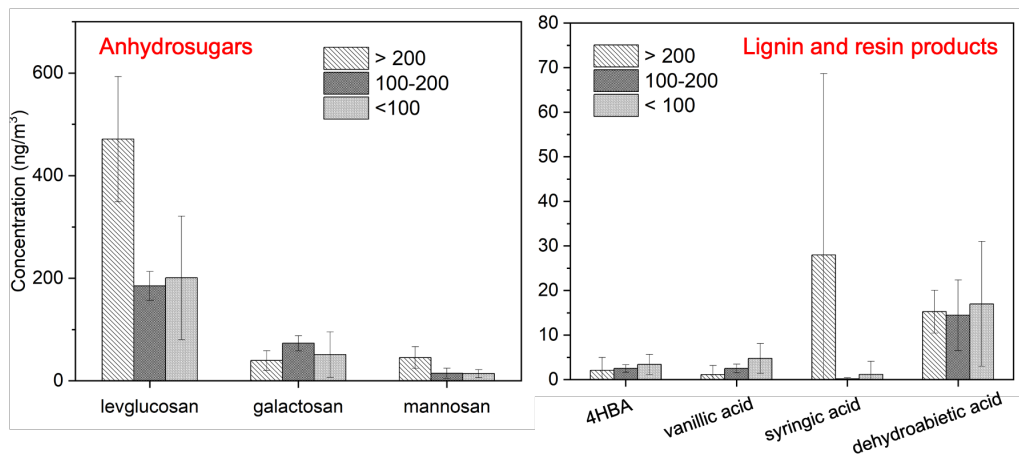

268  
 269  
 270  
 271  
 272  
 273  
 274  
 275

**Figure S7.** Average concentrations of measured biomass burning tracers during three episodes with  $PM_{2.5}$  levels in the ranges of  $> 200$ ,  $100-200$ , and  $< 100 \mu g m^{-3}$ , respectively.

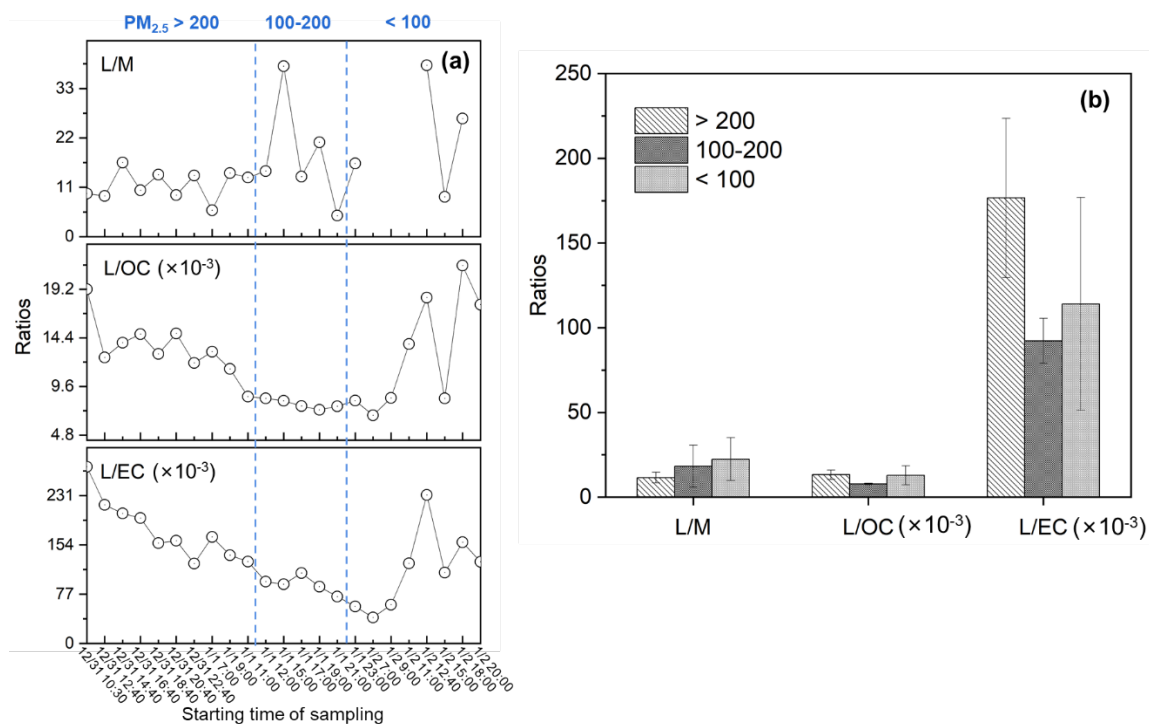

276  
 277  
 278  
 279  
 280  
 281  
 282  
 283

**Figure S8.** (a) Temporal variations of ratios of L/M, L/OC, and L/EC, and (b) the average ratios during three episodes ( $> 200$ ,  $100-200$ , and  $< 100 \mu g m^{-3}$ ). L refers to levoglucosan, M is mannosan, OC means organic carbon, EC is elemental carbon.

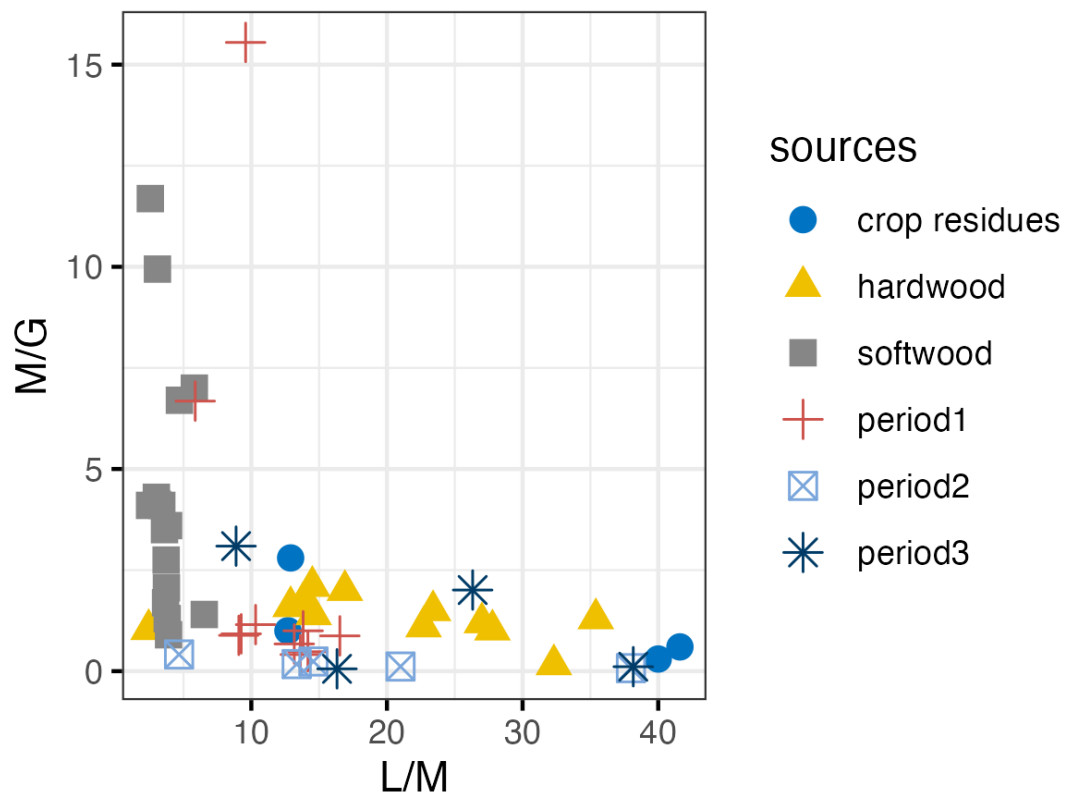

285

286 **Figure S9.** Comparison of L/M and M/G ratios from source emissions (literature values)  
 287 and ambient aerosols in this study. L/M=levoglucosan to mannosan; M/G=mannosan  
 288 to galactosan.

289

290

291

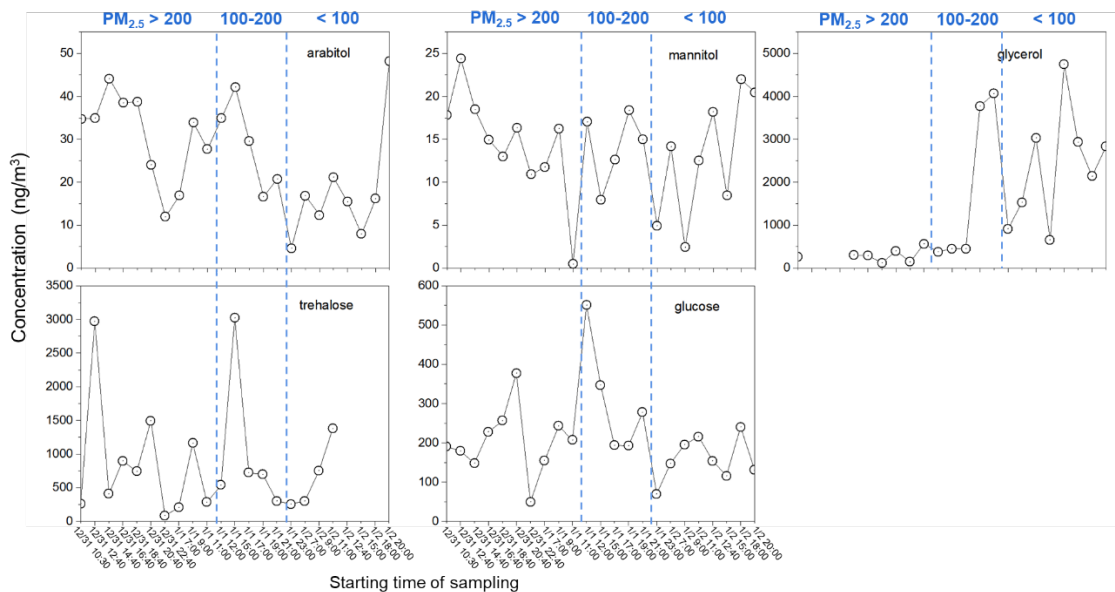

293

294 **Figure S10.** Temporal variations of sugars and sugar alcohols (ng/m<sup>3</sup>).

295

296

297

298

299

300

301

302

303

304

305

306

307

308

309

310

311

312

313

314

315

316

317

318

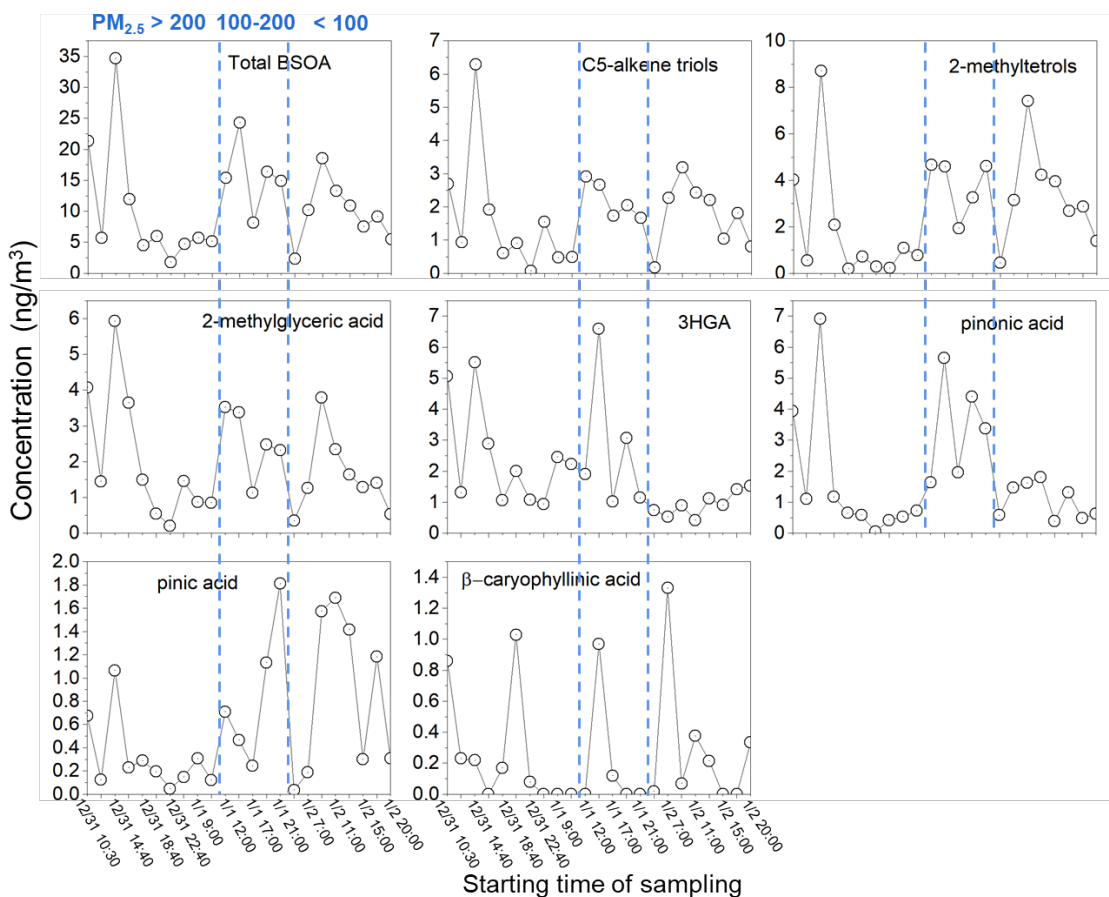

319

319 **Figure S11.** Temporal variations of ratios of biogenic SOA tracers in PM<sub>2.5</sub>.

320

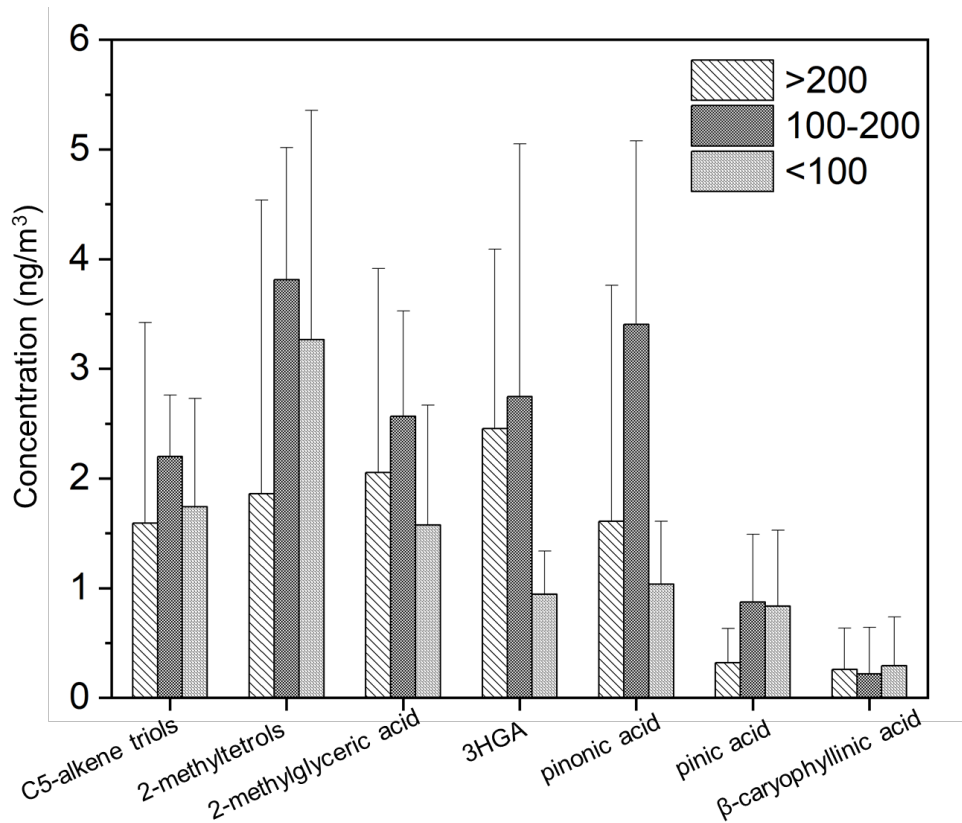

321  
 322 **Figure S12.** Average concentrations of biogenic SOA tracers detected in three episodes  
 323 according to  $\text{PM}_{2.5}$  concentration (i.e., > 200, 100-200, and < 100  $\mu\text{g}/\text{m}^3$ ).  
 324

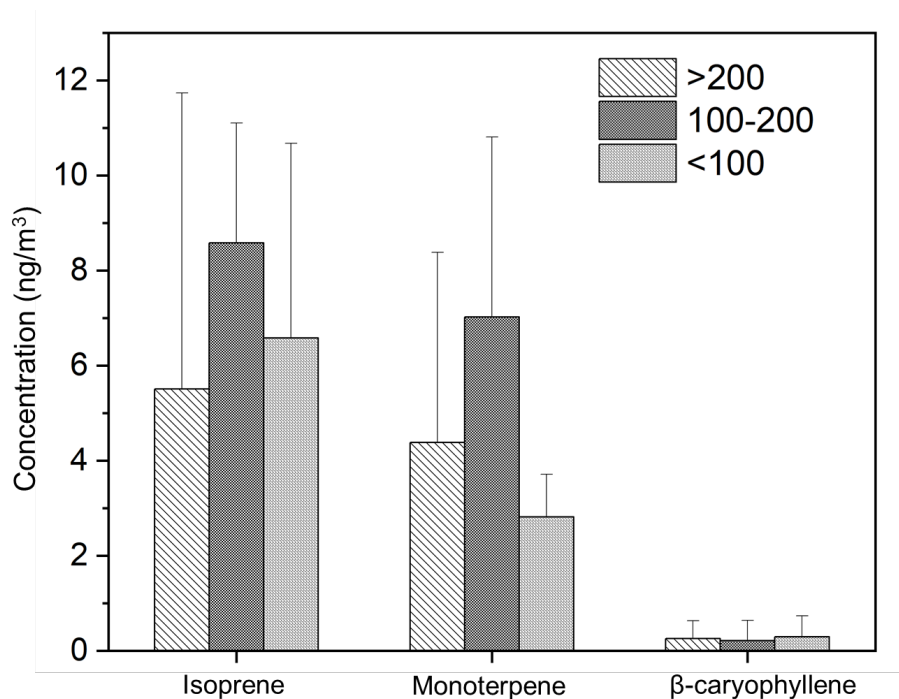

325  
 326  
 327  
 328  
 329  
 330  
 331  
 332  
 333  
 334  
 335  
 336  
 337  
 338  
 339  
 340  
 341  
 342 **Figure S13.** Average concentrations of isoprene, monoterpene, and  $\beta$ -caryophyllene  
 343 SOA tracers detected in three episodes according to  $\text{PM}_{2.5}$  concentration (i.e., > 200,  
 344 100-200, and < 100  $\mu\text{g}/\text{m}^3$ ).  
 345

346  
 347  
 348  
 349  
 350  
 351  
 352  
 353  
 354  
 355  
 356  
 357  
 358  
 359  
 360  
 361  
 362  
 363  
 364  
 365  
 366  
 367  
 368  
 369  
 370  
 371  
 372  
 373  
 374

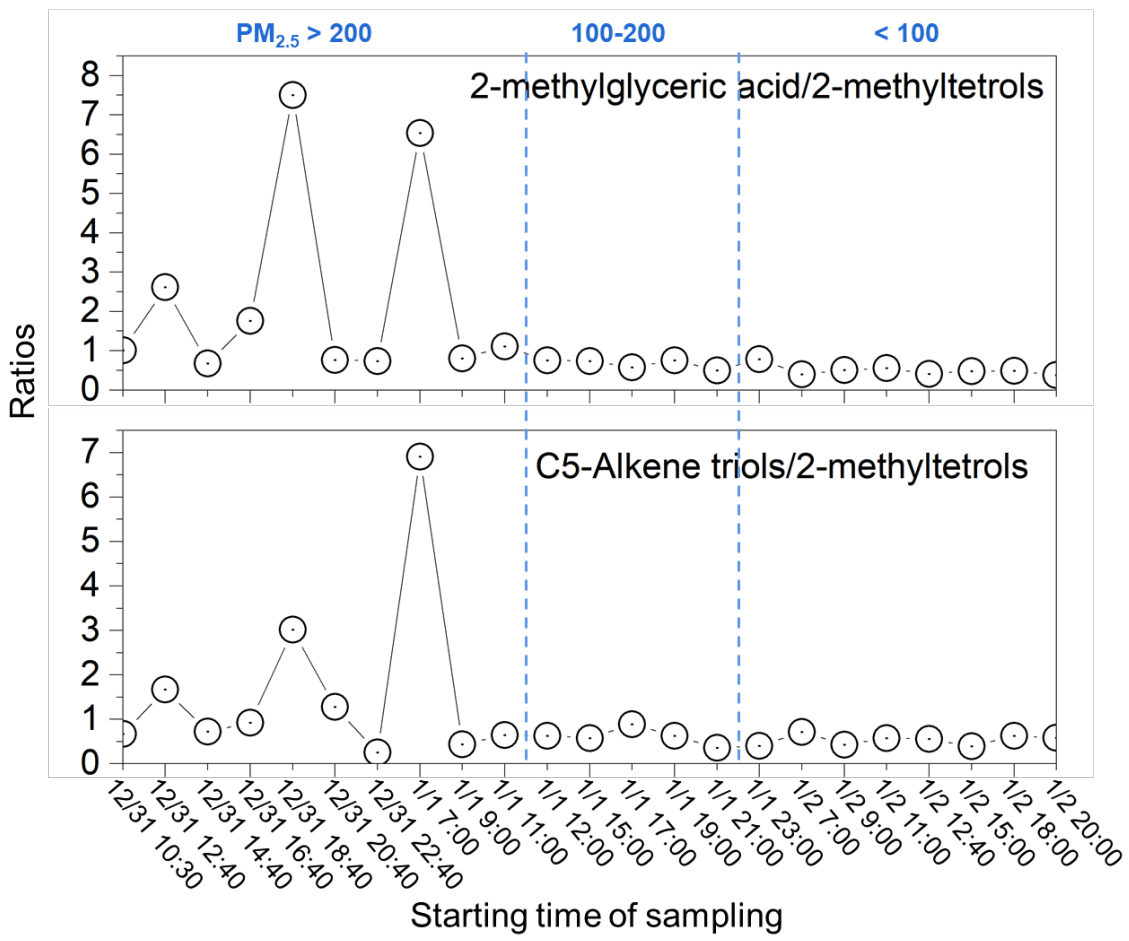

**Figure S14.** Temporal variations in the concentration ratios of isoprene oxidation products in  $PM_{2.5}$ .



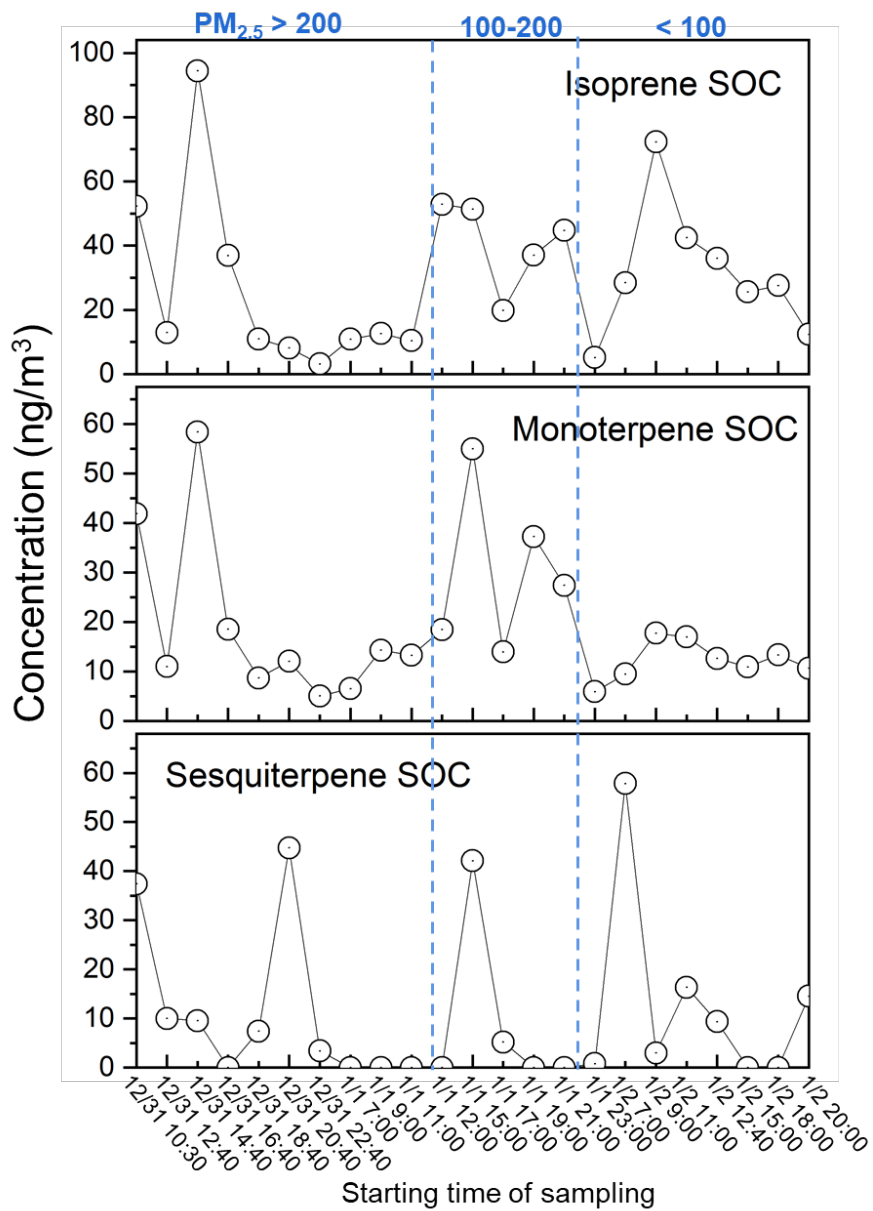

**Figure S15.** Temporal variations in the biogenic secondary organic carbon (SOC) derived from isoprene, monoterpene, and sesquiterpene in PM<sub>2.5</sub>.

408  
409  
410  
411  
412  
413  
414  
415  
416  
417  
418  
419  
420  
421  
422  
423  
424  
425  
426  
427  
428  
429  
430  
431  
432  
433  
434  
435  
436  
437  
438  
439  
440  
441  
442  
443

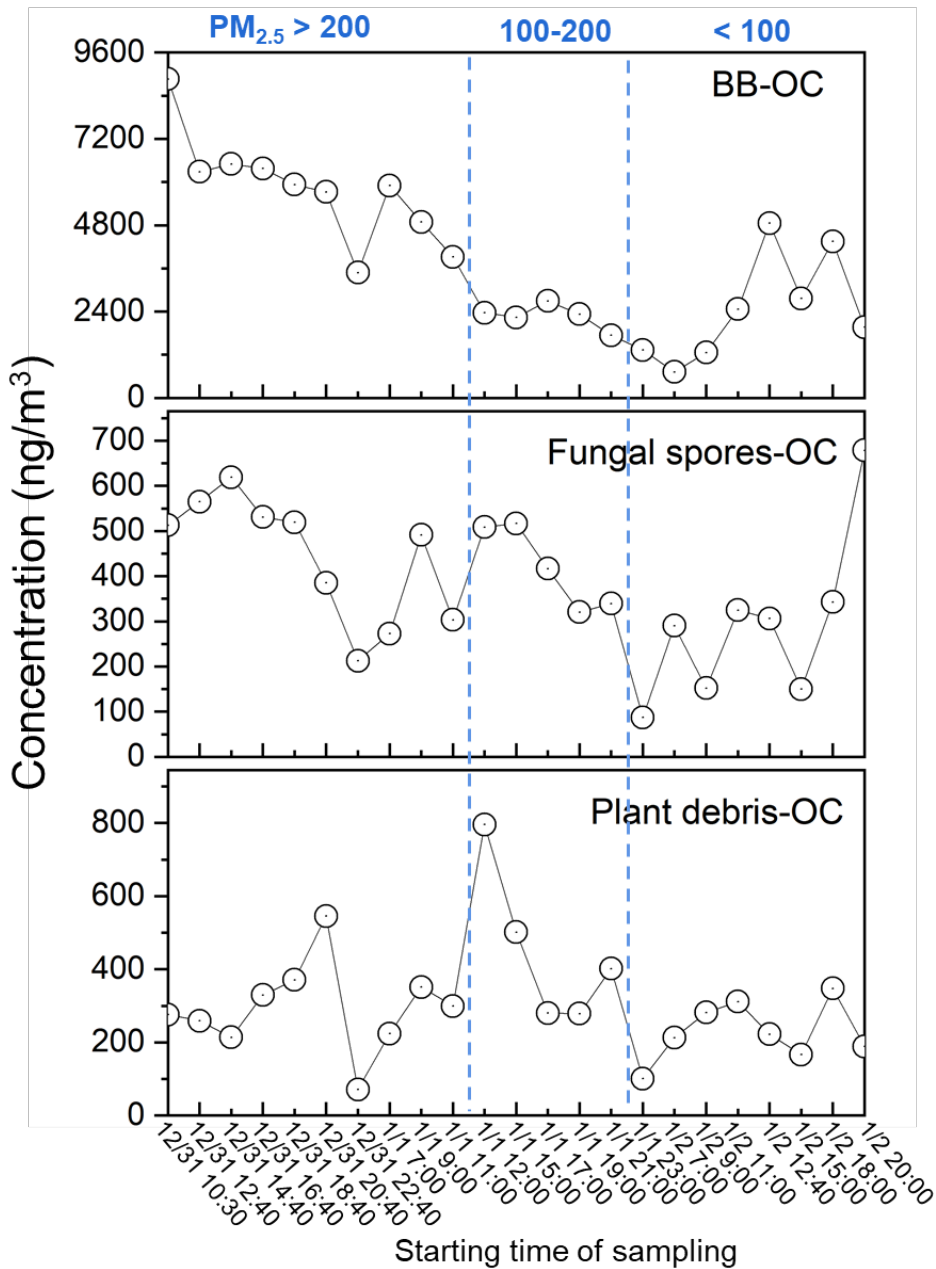

**Figure S16.** Temporal variations in biomass burning derived OC, fungal spores derived OC, and plant debris derived OC in PM<sub>2.5</sub>.

444 **References**

445

446 Chen, L., Wang, J., Gao, Y., Xu, G., Yang, X., Lin, Q., and Zhang, Y.: Latitudinal  
447 distributions of atmospheric MSA and MSA/nss-SO<sub>4</sub><sup>2-</sup> ratios in summer over the  
448 high latitude regions of the Southern and Northern Hemispheres, *Journal of*  
449 *Geophysical Research: Atmospheres*, 117, <https://doi.org/10.1029/2011JD016559>,  
450 2012.

451 Cheng, Y., Engling, G., He, K.-B., Duan, F.-K., Ma, Y.-L., Du, Z.-Y., Liu, J.-M., Zheng,  
452 M., and Weber, R. J.: Biomass burning contribution to Beijing aerosol,  
453 *Atmospheric Chemistry and Physics*, 13, 7765–7781, [https://doi.org/10.5194/acp-](https://doi.org/10.5194/acp-13-7765-2013)  
454 [13-7765-2013](https://doi.org/10.5194/acp-13-7765-2013), 2013.

455 Engling, G., Carrico, C. M., Kreidenweis, S. M., Collett, J. L., Day, D. E., Malm, W.  
456 C., Lincoln, E., Min Hao, W., Iinuma, Y., and Herrmann, H.: Determination of  
457 levoglucosan in biomass combustion aerosol by high-performance anion-exchange  
458 chromatography with pulsed amperometric detection, *Atmospheric Environment*,  
459 40, 299–311, <https://doi.org/10.1016/j.atmosenv.2005.12.069>, 2006.

460 Fu, P., Kawamura, K., Okuzawa, K., Aggarwal, S. G., Wang, G., Kanaya, Y., and Wang,  
461 Z.: Organic molecular compositions and temporal variations of summertime  
462 mountain aerosols over Mt. Tai, North China Plain, *Journal of Geophysical*  
463 *Research: Atmospheres*, 113, <https://doi.org/10.1029/2008JD009900>, 2008.

464 Fu, X., Wang, T., Wang, S., Zhang, L., Cai, S., Xing, J., and Hao, J.: Anthropogenic  
465 Emissions of Hydrogen Chloride and Fine Particulate Chloride in China, *Environ.*  
466 *Sci. Technol.*, 52, 1644–1654, <https://doi.org/10.1021/acs.est.7b05030>, 2018.

467 Kampf, C. J., Corrigan, A. L., Johnson, A. M., Song, W., Keronen, P., Königstedt, R.,  
468 Williams, J., Russell, L. M., Petäjä, T., Fischer, H., and Hoffmann, T.: First  
469 measurements of reactive  $\alpha$ -dicarbonyl concentrations on PM<sub>2.5</sub> aerosol over the  
470 Boreal forest in Finland during HUMPPA-COPEC 2010 &ndash; source  
471 apportionment and links to aerosol aging, *Atmospheric Chemistry and Physics*, 12,  
472 6145–6155, <https://doi.org/10.5194/acp-12-6145-2012>, 2012.

473 Kawamura, K. and Ikushima, K.: Seasonal changes in the distribution of dicarboxylic  
474 acids in the urban atmosphere, *Environ. Sci. Technol.*, 27, 2227–2235,  
475 <https://doi.org/10.1021/es00047a033>, 1993.

476 Khare, P., Kumar, N., Kumari, K. M., and Srivastava, S. S.: Atmospheric formic and  
477 acetic acids: An overview, *Reviews of Geophysics*, 37, 227–248,  
478 <https://doi.org/10.1029/1998RG900005>, 1999.

479 Legrand, M. and Pasteur, E. C.: Methane sulfonic acid to non-sea-salt sulfate ratio in  
480 coastal Antarctic aerosol and surface snow, *Journal of Geophysical Research:*  
481 *Atmospheres*, 103, 10991–11006, <https://doi.org/10.1029/98JD00929>, 1998.

482 Li, G., Lei, W., Bei, N., and Molina, L. T.: Contribution of garbage burning to chloride  
483 and PM<sub>2.5</sub> in Mexico City, *Atmospheric Chemistry and Physics*, 12, 8751–8761,  
484 <https://doi.org/10.5194/acp-12-8751-2012>, 2012.

485 Meng, J., Wang, G., Hou, Z., Liu, X., Wei, B., Wu, C., Cao, C., Wang, J., Li, J., Cao, J.,  
486 Zhang, E., Dong, J., Liu, J., Ge, S., and Xie, Y.: Molecular distribution and stable  
487 carbon isotopic compositions of dicarboxylic acids and related SOA from biogenic

488 sources in the summertime atmosphere of Mt. Tai in the North China Plain,  
489 Atmospheric Chemistry and Physics, 18, 15069–15086,  
490 <https://doi.org/10.5194/acp-18-15069-2018>, 2018.

491 Oros, D. R., Abas, M. R. bin, Omar, N. Y. M. J., Rahman, N. A., and Simoneit, B. R. T.:  
492 Identification and emission factors of molecular tracers in organic aerosols from  
493 biomass burning: Part 3. Grasses, Applied Geochemistry, 21, 919–940,  
494 <https://doi.org/10.1016/j.apgeochem.2006.01.008>, 2006.

495 Paulot, F., Wunch, D., Crounse, J. D., Toon, G. C., Millet, D. B., DeCarlo, P. F.,  
496 Vigouroux, C., Deutscher, N. M., González Abad, G., Notholt, J., Warneke, T.,  
497 Hannigan, J. W., Warneke, C., de Gouw, J. A., Dunlea, E. J., De Mazière, M.,  
498 Griffith, D. W. T., Bernath, P., Jimenez, J. L., and Wennberg, P. O.: Importance of  
499 secondary sources in the atmospheric budgets of formic and acetic acids,  
500 Atmospheric Chemistry and Physics, 11, 1989–2013, <https://doi.org/10.5194/acp-11-1989-2011>, 2011.

502 Sang, X., Zhang, Z., Chan, C., and Engling, G.: Source categories and contribution of  
503 biomass smoke to organic aerosol over the southeastern Tibetan Plateau,  
504 Atmospheric Environment, 78, 113–123,  
505 <https://doi.org/10.1016/j.atmosenv.2012.12.012>, 2013.

506 Schmidl, C., Marr, I. L., Caseiro, A., Kotianová, P., Berner, A., Bauer, H., Kasper-Giebl,  
507 A., and Puxbaum, H.: Chemical characterisation of fine particle emissions from  
508 wood stove combustion of common woods growing in mid-European Alpine  
509 regions, Atmospheric Environment, 42, 126–141,  
510 <https://doi.org/10.1016/j.atmosenv.2007.09.028>, 2008.

511 Sheesley, R. J., Schauer, J. J., Chowdhury, Z., Cass, G. R., and Simoneit, B. R. T.:  
512 Characterization of organic aerosols emitted from the combustion of biomass  
513 indigenous to South Asia, Journal of Geophysical Research: Atmospheres, 108,  
514 <https://doi.org/10.1029/2002JD002981>, 2003.

515 Stavrakou, T., Müller, J.-F., Peeters, J., Razavi, A., Clarisse, L., Clerbaux, C., Coheur,  
516 P.-F., Hurtmans, D., De Mazière, M., Vigouroux, C., Deutscher, N. M., Griffith, D.  
517 W. T., Jones, N., and Paton-Walsh, C.: Satellite evidence for a large source of  
518 formic acid from boreal and tropical forests, Nature Geosci, 5, 26–30,  
519 <https://doi.org/10.1038/ngeo1354>, 2012.

520 Wang, X., Jacob, D. J., Eastham, S. D., Sulprizio, M. P., Zhu, L., Chen, Q., Alexander,  
521 B., Sherwen, T., Evans, M. J., Lee, B. H., Haskins, J. D., Lopez-Hilfiker, F. D.,  
522 Thornton, J. A., Huey, G. L., and Liao, H.: The role of chlorine in global  
523 tropospheric chemistry, Atmospheric Chemistry and Physics, 19, 3981–4003,  
524 <https://doi.org/10.5194/acp-19-3981-2019>, 2019.

525 Wang, X., Jacob, D. J., Fu, X., Wang, T., Breton, M. L., Hallquist, M., Liu, Z., McDuffie,  
526 E. E., and Liao, H.: Effects of Anthropogenic Chlorine on PM<sub>2.5</sub> and Ozone Air  
527 Quality in China, Environ. Sci. Technol., 54, 9908–9916,  
528 <https://doi.org/10.1021/acs.est.0c02296>, 2020.

529 Wang, X., Bi, X., Li, H., Zhang, W., Dai, Q., Song, L., Li, L., Wu, J., Zhang, Y., and  
530 Feng, Y.: The role of sources and meteorology in driving PM<sub>2.5</sub>-bound chlorine,  
531 Journal of Hazardous Materials, 441, 129910,

532 <https://doi.org/10.1016/j.jhazmat.2022.129910>, 2023.

533 Wang, Y., Zhuang, G., Tang, A., Yuan, H., Sun, Y., Chen, S., and Zheng, A.: The ion  
534 chemistry and the source of PM<sub>2.5</sub> aerosol in Beijing, *Atmospheric Environment*,  
535 39, 3771–3784, <https://doi.org/10.1016/j.atmosenv.2005.03.013>, 2005.

536 Wang, Y., Zhuang, G., Zhang, X., Huang, K., Xu, C., Tang, A., Chen, J., and An, Z.:  
537 The ion chemistry, seasonal cycle, and sources of PM<sub>2.5</sub> and TSP aerosol in  
538 Shanghai, *Atmospheric Environment*, 40, 2935–2952,  
539 <https://doi.org/10.1016/j.atmosenv.2005.12.051>, 2006.

540 Wang, Y., Zhuang, G., Chen, S., An, Z., and Zheng, A.: Characteristics and sources of  
541 formic, acetic and oxalic acids in PM<sub>2.5</sub> and PM<sub>10</sub> aerosols in Beijing, China,  
542 *Atmospheric Research*, 84, 169–181,  
543 <https://doi.org/10.1016/j.atmosres.2006.07.001>, 2007.

544 Yang, X., Wang, T., Xia, M., Gao, X., Li, Q., Zhang, N., Gao, Y., Lee, S., Wang, X.,  
545 Xue, L., Yang, L., and Wang, W.: Abundance and origin of fine particulate chloride  
546 in continental China, *Science of The Total Environment*, 624, 1041–1051,  
547 <https://doi.org/10.1016/j.scitotenv.2017.12.205>, 2018.

548 Ye, B., Ji, X., Yang, H., Yao, X., Chan, C. K., Cadle, S. H., Chan, T., and Mulawa, P.  
549 A.: Concentration and chemical composition of PM<sub>2.5</sub> in Shanghai for a 1-year  
550 period, *Atmospheric Environment*, 37, 499–510, [https://doi.org/10.1016/S1352-2310\(02\)00918-4](https://doi.org/10.1016/S1352-2310(02)00918-4), 2003.

552 Yi, X., Sarwar, G., Bian, J., Huang, L., Li, Q., Jiang, S., Liu, H., Wang, Y., Chen, H.,  
553 Wang, T., Chen, J., Saiz-Lopez, A., Wong, D. C., and Li, L.: Significant Impact of  
554 Reactive Chlorine on Complex Air Pollution Over the Yangtze River Delta Region,  
555 China, *Journal of Geophysical Research: Atmospheres*, 128, e2023JD038898,  
556 <https://doi.org/10.1029/2023JD038898>, 2023.

557 Yuan, H., Wang, Y., and Zhuang, G.: MSA in Beijing aerosol, *Chin. Sci. Bull.*, 49,  
558 1020–1025, <https://doi.org/10.1007/BF03184031>, 2004.

559 Zhao, W., Kawamura, K., Yue, S., Wei, L., Ren, H., Yan, Y., Kang, M., Li, L., Ren, L.,  
560 Lai, S., Li, J., Sun, Y., Wang, Z., and Fu, P.: Molecular distribution and compound-  
561 specific stable carbon isotopic composition of dicarboxylic acids, oxocarboxylic  
562 acids and  $\alpha$ -dicarbonyls in PM<sub>2.5</sub> from Beijing, China, *Atmospheric Chemistry and  
563 Physics*, 18, 2749–2767, <https://doi.org/10.5194/acp-18-2749-2018>, 2018.

564 Zhu, C., Kawamura, K., and Kunwar, B.: Effect of biomass burning over the western  
565 North Pacific Rim: wintertime maxima of anhydrosugars in ambient aerosols from  
566 Okinawa, *Atmospheric Chemistry and Physics*, 15, 1959–1973,  
567 <https://doi.org/10.5194/acp-15-1959-2015>, 2015.

568
